# Supplementary material for: Spectroscopy and dynamics of A [2B1] allyl radical
Source: Royal Society of Chemistry journal article supplement (doi:10.1039/b602412b), 2006-01-01
Supplement: b602412b.pdf [file b602412b.pdf]

Spectroscopy and Dynamics of A 2B1 Allyl Radical

Luca Castiglioni, Andreas Bach and Peter Chen

-----  
SUPPORTING INFORMATION (ASCII)  
-----

A.) CCSD/cc-pVTZ optimized geometries and CCSD(T)/cc-pVXZ energies of all stationary points discussed in this work.

=====  
A1. allyl radical (C2v)  
-----

|   |         |           |           |
|---|---------|-----------|-----------|
| 6 | .000000 | .000000   | .453087   |
| 6 | .000000 | 1.236422  | -.199983  |
| 6 | .000000 | -1.236422 | -.199983  |
| 1 | .000000 | 1.292722  | -1.295402 |
| 1 | .000000 | .000000   | 1.552138  |
| 1 | .000000 | 2.176963  | .359971   |
| 1 | .000000 | -1.292722 | -1.295402 |
| 1 | .000000 | -2.176963 | .359971   |

Rotational constants (cm-1): 1.619, 0.314, 0.217

CCSD(T) energies / Hartree  
cc-pVDZ: -116.91324984  
cc-pVTZ: -117.03153584  
cc-pVQZ: -117.06495454  
CBS (est.): -117.07811400

=====  
A2. 2-propenyl radical (Cs)  
-----

|   |           |           |          |
|---|-----------|-----------|----------|
| 6 | .000000   | .431550   | .000000  |
| 6 | -1.198336 | -.453558  | .000000  |
| 6 | 1.322938  | .292246   | .000000  |
| 1 | -.890376  | -1.519907 | .000000  |
| 1 | -1.823253 | -.274053  | .892916  |
| 1 | -1.823253 | -.274053  | -.892916 |
| 1 | 1.999855  | 1.155741  | .000000  |
| 1 | 1.789413  | -.709157  | .000000  |

CCSD(T) energies / Hartree  
cc-pVDZ: -116.88228932  
cc-pVTZ: -116.99982427  
cc-pVQZ: -117.03307264  
CBS (est.): -117.04618810

=====

A3. cyclopropyl radical (Cs)

```

-----
 6      .029817      .902096      .000000
 6      .029817     -.369614      .770597
 6      .029817     -.369614     -.770597
 1     -.686726      1.728456      .000000
 1     -.884614     -.667188      1.301169
 1     -.884614     -.667188     -1.301169
 1      .959628     -.685641      1.261381
 1      .959628     -.685641     -1.261381

```

```

CCSD(T) energies / Hartree
cc-pVDZ:  -116.86721303
cc-pVTZ:  -116.98596647
cc-pVQZ:  -117.01931718
CBS (est.): -117.02690080

```

=====  
A4. allene (D2d)  
-----

```

 6      .000000      .000000      1.324407
 6      .000000      .000000      .000000
 6      .000000      .000000     -1.324407
 1      .000000      .940059      1.888582
 1      .000000     -.940059      1.888582
 1      .940059      .000000     -1.888582
 1     -.940059      .000000     -1.888582

```

```

CCSD(T) energies / Hartree
cc-pVDZ:  -116.31664325
cc-pVTZ:  -116.43288182
cc-pVQZ:  -116.46584230
CBS (est.): -116.47888770

```

=====  
A5. propine (C3v)  
-----

```

 6      .000000      .000000      1.442312
 6      .000000      .000000      .219068
 6      .000000      .000000     -1.257982
 1      .000000      .000000      2.519482
 1      .000000      1.032697     -1.646624
 1      .894342     -.516349     -1.646624
 1     -.894342     -.516349     -1.646624

```

```

CCSD(T) energies / Hartree
cc-pVDZ:  -116.31746385
cc-pVTZ:  -116.43470447
cc-pVQZ:  -116.46785976
CBS (est.): -116.48093310

```

=====  
A6. cyclopropene (C2v)  
-----

|   |           |          |          |
|---|-----------|----------|----------|
| 6 | .689171   | -.529137 | .000000  |
| 6 | -.799772  | -.213801 | .000000  |
| 6 | .000000   | .827856  | .000000  |
| 1 | 1.166492  | -.895617 | .923437  |
| 1 | 1.166492  | -.895617 | -.923437 |
| 1 | -1.807690 | -.626427 | .000000  |
| 1 | .138313   | 1.908147 | .000000  |

CCSD(T) energies / Hartree

cc-pVDZ: -116.28090425

cc-pVTZ: -116.39728206

cc-pVQZ: -116.43046485

CBS (est.): -116.44370000

=====  
A7. TS 1 (allyl -> allene + H) (Cs)  
-----

|   |           |           |          |
|---|-----------|-----------|----------|
| 6 | 0.000000  | 0.056305  | 0.000000 |
| 1 | 0.167286  | 1.969457  | 0.000000 |
| 6 | -1.324096 | 0.000108  | 0.000000 |
| 6 | 1.303416  | -0.261715 | 0.000000 |
| 1 | -1.949570 | 0.896642  | 0.000000 |
| 1 | -1.818706 | -0.979504 | 0.000000 |
| 1 | 1.862535  | -0.327392 | 0.940515 |
| 1 | 1.862535  | -0.327392 | -0.9405  |

CCSD(T) energies / Hartree

cc-pVDZ: -116.80594811

cc-pVTZ: -116.92463326

cc-pVQZ: -116.95827402

CBS (est.): -116.97158120

=====  
A8. TS 2 (allyl -> 2-propenyl) (C1)  
-----

|   |           |           |           |
|---|-----------|-----------|-----------|
| 6 | -1.292335 | 0.146356  | 0.009413  |
| 6 | 0.070060  | -0.327066 | -0.095371 |
| 6 | 1.334536  | 0.114380  | -0.000649 |
| 1 | -0.823230 | -0.987078 | 0.585110  |
| 1 | -1.557523 | 1.022434  | 0.621142  |
| 1 | -2.036262 | -0.246441 | -0.692523 |
| 1 | 1.576873  | 1.161723  | -0.244930 |
| 1 | 2.166576  | -0.552656 | 0.250840  |

CCSD(T) energies / Hartree

cc-pVDZ: -116.80353561

cc-pVTZ: -116.92372383

cc-pVQZ: -116.95759195

CBS (est.): -116.97088030

=====  
A9. TS 3 (2-propenyl -> allene + H) (Cs)  
-----

|   |           |           |           |
|---|-----------|-----------|-----------|
| 6 | 0.000000  | 0.148337  | 0.000000  |
| 6 | -1.062158 | -0.665021 | 0.000000  |
| 6 | 1.117854  | 0.849184  | 0.000000  |
| 1 | -0.380704 | -2.479781 | 0.000000  |
| 1 | -1.575750 | -0.904345 | 0.937866  |
| 1 | -1.575750 | -0.904345 | -0.937866 |
| 1 | 1.103319  | 1.945661  | 0.000000  |
| 1 | 2.094708  | 0.347805  | 0.000000  |

CCSD(T) energies / Hartree

cc-pVDZ: -116.80878104

cc-pVTZ: -116.92753249

cc-pVQZ: -116.96112485

CBS (est.): -116.97437590

=====  
A10. TS 4 (2-propenyl -> propine + H) (Cs)  
-----

|   |           |           |           |
|---|-----------|-----------|-----------|
| 6 | 0.000000  | 0.205934  | 0.000000  |
| 6 | 1.002284  | 0.926692  | 0.000000  |
| 6 | -1.040821 | -0.839023 | 0.000000  |
| 1 | 2.532283  | -0.217369 | 0.000000  |
| 1 | 1.635351  | 1.800771  | 0.000000  |
| 1 | -1.680324 | -0.751869 | 0.894867  |
| 1 | -1.680324 | -0.751869 | -0.894867 |
| 1 | -0.575761 | -1.841279 | 0.000000  |

CCSD(T) energies / Hartree

cc-pVDZ: -116.80931712

cc-pVTZ: -116.92865334

cc-pVQZ: -116.96235276

CBS (est.): -116.97561400

=====  
A11. TS 5 (allyl -> cyclopropyl) (C1)  
-----

|   |           |           |           |
|---|-----------|-----------|-----------|
| 6 | 0.078923  | 0.707383  | -0.246773 |
| 6 | 0.970402  | -0.334311 | 0.037541  |
| 6 | -1.049056 | -0.206742 | 0.064597  |
| 1 | 0.179883  | 1.697879  | 0.210243  |
| 1 | 1.777871  | -0.266875 | 0.787864  |
| 1 | 0.934312  | -1.267596 | -0.537761 |
| 1 | -1.422932 | -0.930990 | -0.668463 |
| 1 | -1.470749 | -0.230401 | 1.075921  |

CCSD(T) energies / Hartree

cc-pVDZ: -116.82729431

cc-pVTZ: -116.94675083  
 cc-pVQZ: -116.98034966  
 CBS (est.): -116.99341146

=====

A12. TS 6 (cyclopropyl -> cyclopropene + H) (C1)

-----

|   |           |           |           |
|---|-----------|-----------|-----------|
| 6 | 0.855186  | -0.270718 | 0.001220  |
| 6 | -0.174401 | 0.837139  | 0.093907  |
| 6 | -0.645622 | -0.348601 | -0.264358 |
| 1 | 1.563154  | -0.269246 | -0.843511 |
| 1 | 1.253117  | -0.731468 | 0.918910  |
| 1 | -0.348225 | 1.894619  | 0.287518  |
| 1 | -1.436131 | -0.913580 | -0.755850 |
| 1 | -1.242889 | -1.287247 | 1.408321  |

CCSD(T) energies / Hartree  
 cc-pVDZ: -116.77504094  
 cc-pVTZ: -116.89376634  
 cc-pVQZ: -116.92751929  
 CBS (est.): -116.94092998

B.) HCTH147/TZ2P harmonic and anharmonic frequencies and zero point energies  
 of all stationary points discussed in this work.

=====

B1. allyl radical (C2v)

-----

Vibrational Energies and Rotational Constants (cm-1)

| Mode(Quanta)                               | E(harm)   | E(anharm) | Aa(z)    | Ba(x)    | Ca(y)    |
|--------------------------------------------|-----------|-----------|----------|----------|----------|
| Equilibrium Geometry                       |           |           |          |          |          |
| Ground State                               | 14357.259 | 14216.010 | 1.841004 | 0.344158 | 0.289950 |
| Fundamental Bands (DE w.r.t. Ground State) |           |           |          |          |          |
| 1(1)                                       | 3228.040  | 3104.516  | 1.820927 | 0.341691 | 0.287465 |
| 2(1)                                       | 3130.504  | 3031.286  | 1.819125 | 0.341822 | 0.287471 |
| 3(1)                                       | 3116.125  | 3021.254  | 1.822124 | 0.341432 | 0.287283 |
| 4(1)                                       | 1497.166  | 1450.370  | 1.832854 | 0.342009 | 0.286887 |
| 5(1)                                       | 1255.318  | 1220.051  | 1.839652 | 0.341125 | 0.288468 |
| 6(1)                                       | 1024.205  | 990.742   | 1.837238 | 0.341708 | 0.287237 |
| 7(1)                                       | 422.402   | 427.378   | 1.796729 | 0.341012 | 0.287374 |
| 8(1)                                       | 782.040   | 788.739   | 1.799317 | 0.341607 | 0.288000 |
| 9(1)                                       | 539.354   | 536.306   | 1.817980 | 0.342078 | 0.287766 |
| 10(1)                                      | 997.210   | 975.707   | 1.810908 | 0.343337 | 0.287926 |
| 11(1)                                      | 804.693   | 805.734   | 1.810488 | 0.341126 | 0.287912 |
| 12(1)                                      | 520.630   | 531.176   | 1.857524 | 0.341924 | 0.288247 |
| 13(1)                                      | 3226.273  | 3102.844  | 1.820865 | 0.341709 | 0.287484 |
| 14(1)                                      | 3123.964  | 3026.419  | 1.818990 | 0.341855 | 0.287504 |
| 15(1)                                      | 1502.179  | 1437.759  | 1.820905 | 0.341888 | 0.287459 |
| 16(1)                                      | 1406.942  | 1374.974  | 1.826510 | 0.342744 | 0.287646 |
| 17(1)                                      | 1214.033  | 1193.427  | 1.811965 | 0.342379 | 0.285530 |
| 18(1)                                      | 923.440   | 911.801   | 1.850324 | 0.340631 | 0.287413 |

ZPEharm = 14357.25875 cm-1 = 41.049 Kcal/mol = 171.751 KJ/mol  
 ZPEfund = 13965.24180 cm-1 = 39.929 Kcal/mol = 167.061 KJ/mol  
 ZPEaver = 14161.25028 cm-1 = 40.489 Kcal/mol = 169.406 KJ/mol  
 -1/4sumXii = 23.58486 cm-1 = 0.067 Kcal/mol = 0.282 KJ/mol  
 x0 = 31.17479 cm-1 = 0.089 Kcal/mol = 0.373 KJ/mol  
 ZPEtot = 14216.00993 cm-1 = 40.646 Kcal/mol = 170.061 KJ/mol  
 ZPEtot/ZPEharm = 0.99016 ZPEfund/ZPEharm= 0.97270

=====  
 B2. 2-propenyl radical (Cs)  
 -----

Vibrational Energies and Rotational Constants (cm-1)

| Mode(Quanta)                               | E(harm)   | E(anharm) | Aa(z)    | Ba(x)    | Ca(y)    |
|--------------------------------------------|-----------|-----------|----------|----------|----------|
| Equilibrium Geometry                       |           |           |          |          |          |
| Ground State                               | 14142.655 | 13905.997 | 2.558798 | 0.285048 | 0.269167 |
| Fundamental Bands (DE w.r.t. Ground State) |           |           |          |          |          |
| 1(1)                                       | 3130.805  | 2979.200  | 2.563291 | 0.284275 | 0.268559 |
| 2(1)                                       | 3039.682  | 2882.204  | 2.553827 | 0.284832 | 0.269118 |
| 3(1)                                       | 3018.478  | 2882.021  | 2.552003 | 0.284766 | 0.268859 |
| 4(1)                                       | 2951.902  | 2815.517  | 2.554372 | 0.284956 | 0.269108 |
| 5(1)                                       | 1719.658  | 1681.257  | 2.532867 | 0.284166 | 0.268118 |
| 6(1)                                       | 1444.739  | 1391.200  | 2.732284 | 0.285387 | 0.270493 |
| 7(1)                                       | 1396.879  | 1353.613  | 2.551507 | 0.285423 | 0.269059 |
| 8(1)                                       | 1362.265  | 1322.648  | 2.529617 | 0.284108 | 0.267816 |
| 9(1)                                       | 1081.078  | 1044.577  | 2.657329 | 0.284283 | 0.268190 |
| 10(1)                                      | 918.129   | 899.049   | 2.570228 | 0.284088 | 0.268643 |
| 11(1)                                      | 887.915   | 864.661   | 2.696950 | 0.285282 | 0.268354 |
| 12(1)                                      | 306.108   | 284.686   | 2.625460 | 0.284799 | 0.268760 |
| 13(1)                                      | 3067.291  | 2903.887  | 2.556326 | 0.284922 | 0.269076 |
| 14(1)                                      | 1431.464  | 1392.935  | 2.429763 | 0.285920 | 0.269430 |
| 15(1)                                      | 1025.950  | 988.251   | 2.492288 | 0.284962 | 0.269002 |
| 16(1)                                      | 860.805   | 856.437   | 2.384103 | 0.284734 | 0.269388 |
| 17(1)                                      | 460.689   | 457.481   | 2.581538 | 0.284718 | 0.269249 |
| 18(1)                                      | 181.472   | 132.098   | 2.507836 | 0.284464 | 0.269363 |

ZPEharm = 14142.65522 cm-1 = 40.436 Kcal/mol = 169.184 KJ/mol  
 ZPEfund = 13565.86038 cm-1 = 38.787 Kcal/mol = 162.284 KJ/mol  
 ZPEaver = 13854.25780 cm-1 = 39.611 Kcal/mol = 165.734 KJ/mol  
 -1/4sumXii = 67.43361 cm-1 = 0.193 Kcal/mol = 0.807 KJ/mol  
 x0 = -15.69464 cm-1 = -0.045 Kcal/mol = -0.188 KJ/mol  
 ZPEtot = 13905.99677 cm-1 = 39.759 Kcal/mol = 166.353 KJ/mol  
 ZPEtot/ZPEharm = 0.98327 ZPEfund/ZPEharm= 0.95922

=====  
 B3. cyclopropyl radical (Cs)  
 -----

Vibrational Energies and Rotational Constants (cm-1)

| Mode(Quanta)                               | E(harm)   | E(anharm) | Aa(z)    | Ba(x)    | Ca(y)    |
|--------------------------------------------|-----------|-----------|----------|----------|----------|
| Equilibrium Geometry                       |           |           |          |          |          |
| Ground State                               | 14452.948 | 14231.995 | 0.794329 | 0.687603 | 0.437389 |
| Fundamental Bands (DE w.r.t. Ground State) |           |           |          |          |          |
| 1(1)                                       | 3205.813  | 3071.252  | 0.791899 | 0.686332 | 0.436832 |
| 2(1)                                       | 3145.424  | 2993.039  | 0.793648 | 0.686864 | 0.436923 |

|       |          |          |          |          |          |
|-------|----------|----------|----------|----------|----------|
| 3(1)  | 3065.870 | 2939.990 | 0.793302 | 0.686645 | 0.437082 |
| 4(1)  | 1457.843 | 1409.238 | 0.794439 | 0.686437 | 0.438366 |
| 5(1)  | 1254.607 | 1230.359 | 0.793483 | 0.687438 | 0.436397 |
| 6(1)  | 1073.534 | 1056.600 | 0.793985 | 0.725157 | 0.437818 |
| 7(1)  | 1000.368 | 958.528  | 0.794086 | 0.685609 | 0.435821 |
| 8(1)  | 849.520  | 821.047  | 0.796791 | 0.682357 | 0.427909 |
| 9(1)  | 754.901  | 730.862  | 0.795112 | 0.682908 | 0.413482 |
| 10(1) | 524.160  | 452.360  | 0.795366 | 0.686001 | 0.435231 |
| 11(1) | 3134.087 | 2981.561 | 0.793535 | 0.687050 | 0.436954 |
| 12(1) | 3067.045 | 2940.886 | 0.793281 | 0.686597 | 0.437089 |
| 13(1) | 1432.065 | 1391.372 | 0.795505 | 0.686755 | 0.438586 |
| 14(1) | 1140.357 | 1108.449 | 0.800147 | 0.685024 | 0.441371 |
| 15(1) | 1068.632 | 1032.641 | 0.789278 | 0.657863 | 0.432933 |
| 16(1) | 1037.262 | 1005.551 | 0.793320 | 0.683664 | 0.435966 |
| 17(1) | 927.804  | 903.224  | 0.790131 | 0.689340 | 0.442972 |
| 18(1) | 766.605  | 756.026  | 0.792190 | 0.690623 | 0.460485 |

ZPEharm = 14452.94836 cm-1 = 41.323 Kcal/mol = 172.896 KJ/mol  
 ZPEfund = 13891.49345 cm-1 = 39.718 Kcal/mol = 166.179 KJ/mol  
 ZPEaver = 14172.22090 cm-1 = 40.520 Kcal/mol = 169.537 KJ/mol  
 -1/4sumXii = 47.57938 cm-1 = 0.136 Kcal/mol = 0.569 KJ/mol  
 x0 = 12.19495 cm-1 = 0.035 Kcal/mol = 0.146 KJ/mol  
 ZPEtot = 14231.99523 cm-1 = 40.691 Kcal/mol = 170.252 KJ/mol  
 ZPEtot/ZPEharm = 0.98471    ZPEfund/ZPEharm= 0.96115

=====  
 B4. allene (D2d)  
 -----

Vibrational Energies and Rotational Constants (cm-1)

| Mode(Quanta)                               | E(harm)   | E(anharm) | Aa(z)     | Ba(x)     | Ca(y)     |
|--------------------------------------------|-----------|-----------|-----------|-----------|-----------|
| Equilibrium Geometry                       |           |           | 0.000000  | 0.000000  | 0.000000  |
| Ground State                               | 11891.282 | 11783.869 | -0.045303 | -0.001008 | -0.001008 |
| Fundamental Bands (DE w.r.t. Ground State) |           |           |           |           |           |
| 1(1)                                       | 3110.837  | 3006.809  | -0.085769 | -0.001275 | -0.001275 |
| 2(1)                                       | 1452.083  | 1416.243  | -0.016897 | -0.001107 | -0.001107 |
| 3(1)                                       | 1093.559  | 1081.292  | -0.046806 | -0.001412 | -0.001412 |
| 4(1)                                       | 866.951   | 867.700   | -0.113939 | -0.001804 | -0.001804 |
| 5(1)                                       | 3106.448  | 2998.064  | -0.082146 | -0.001281 | -0.001281 |
| 6(1)                                       | 2005.423  | 1980.284  | -0.048722 | -0.002947 | -0.002947 |
| 7(1)                                       | 1398.231  | 1366.265  | 0.007270  | -0.000771 | -0.000771 |
| 8(1)                                       | 3185.805  | 3064.912  | -0.070316 | -0.001297 | -0.001335 |
| 9(1)                                       | 3185.805  | 3064.917  | -0.070316 | -0.001335 | -0.001297 |
| 10(1)                                      | 992.289   | 981.369   | 0.171353  | -0.001258 | -0.000059 |
| 11(1)                                      | 992.289   | 981.364   | 0.171353  | -0.000059 | -0.001258 |
| 12(1)                                      | 838.895   | 840.469   | -0.234812 | -0.001366 | -0.000750 |
| 13(1)                                      | 838.895   | 840.480   | -0.234812 | -0.000750 | -0.001366 |
| 14(1)                                      | 357.528   | 365.961   | -0.057798 | 0.000024  | -0.000504 |
| 15(1)                                      | 357.528   | 365.961   | -0.057798 | -0.000504 | 0.000024  |

ZPEharm = 11891.28170 cm-1 = 33.999 Kcal/mol = 142.251 KJ/mol  
 ZPEfund = 11611.04454 cm-1 = 33.198 Kcal/mol = 138.899 KJ/mol  
 ZPEaver = 11751.16312 cm-1 = 33.598 Kcal/mol = 140.575 KJ/mol  
 -1/4sumXii = 21.81428 cm-1 = 0.062 Kcal/mol = 0.261 KJ/mol  
 x0 = 10.89176 cm-1 = 0.031 Kcal/mol = 0.130 KJ/mol  
 ZPEtot = 11783.86916 cm-1 = 33.692 Kcal/mol = 140.966 KJ/mol

ZPEtot/ZPEharm = 0.99097    ZPEfund/ZPEharm= 0.97643

=====  
B5.    propine (C3v)  
-----

Vibrational Energies and Rotational Constants (cm-1)

| Mode(Quanta)                               | E(harm)   | E(anharm) | Aa(z)       | Ba(x)     | Ca(y)     |
|--------------------------------------------|-----------|-----------|-------------|-----------|-----------|
| Equilibrium Geometry                       |           |           | 0.000000    | 0.000000  | 0.000000  |
| Ground State                               | 11963.693 | 11858.027 | -0.058959   | -0.000737 | -0.000735 |
| Fundamental Bands (DE w.r.t. Ground State) |           |           |             |           |           |
| 1(1)                                       | 3438.802  | 3328.680  | -0.059099   | -0.001405 | -0.001403 |
| 2(1)                                       | 3008.244  | 2913.286  | -0.112781   | -0.000780 | -0.000778 |
| 3(1)                                       | 2178.188  | 2141.441  | -0.061566   | -0.002151 | -0.002149 |
| 4(1)                                       | 1379.256  | 1360.056  | -0.029993   | -0.002393 | -0.002391 |
| 5(1)                                       | 935.832   | 925.804   | -0.065272   | -0.002144 | -0.002142 |
| 6(1)                                       | 3081.491  | 2963.062  | 459.978236  | -0.000754 | -0.000777 |
| 7(1)                                       | 3081.490  | 2934.317  | -460.164873 | -0.000778 | -0.000751 |
| 8(1)                                       | 1451.215  | 1401.591  | *****       | -0.000529 | 0.000907  |
| 9(1)                                       | 1451.214  | 1479.269  | *****       | 0.000904  | -0.000526 |
| 10(1)                                      | 1026.416  | 1032.873  | *****       | -0.000835 | -0.000888 |
| 11(1)                                      | 1026.416  | 1016.393  | *****       | -0.000891 | -0.000834 |
| 12(1)                                      | 607.277   | 613.892   | *****       | -0.000622 | -0.000323 |
| 13(1)                                      | 607.277   | 607.705   | *****       | -0.000325 | -0.000621 |
| 14(1)                                      | 327.137   | 342.609   | *****       | -0.000193 | 0.000369  |
| 15(1)                                      | 327.132   | 332.106   | *****       | 0.000368  | -0.000189 |

ZPEharm    = 11963.69276 cm-1    = 34.206 Kcal/mol    = 143.118 KJ/mol  
ZPEfund    = 11696.54239 cm-1    = 33.442 Kcal/mol    = 139.922 KJ/mol  
ZPEaver    = 11830.11757 cm-1    = 33.824 Kcal/mol    = 141.520 KJ/mol  
-1/4sumXii = 37.08225 cm-1    = 0.106 Kcal/mol    = 0.444 KJ/mol  
x0          = -9.17299 cm-1    = -0.026 Kcal/mol    = -0.110 KJ/mol  
ZPEtot     = 11858.02684 cm-1    = 33.904 Kcal/mol    = 141.854 KJ/mol  
ZPEtot/ZPEharm = 0.99117    ZPEfund/ZPEharm= 0.97767

=====  
B6.    cyclopropene (C2v)  
-----

Vibrational Energies and Rotational Constants (cm-1)

| Mode(Quanta)                               | E(harm)   | E(anharm) | Aa(z)    | Ba(x)    | Ca(y)    |
|--------------------------------------------|-----------|-----------|----------|----------|----------|
| Equilibrium Geometry                       |           |           | 1.007453 | 0.734646 | 0.464191 |
| Ground State                               | 12119.867 | 11986.308 | 0.999337 | 0.729255 | 0.459958 |
| Fundamental Bands (DE w.r.t. Ground State) |           |           |          |          |          |
| 1(1)                                       | 3265.408  | 3159.313  | 0.996198 | 0.727800 | 0.458736 |
| 2(1)                                       | 3221.033  | 3122.196  | 0.996385 | 0.727849 | 0.458810 |
| 3(1)                                       | 3023.805  | 3047.436  | 0.997937 | 0.728629 | 0.459973 |
| 4(1)                                       | 1704.478  | 1674.849  | 0.996380 | 0.728620 | 0.459263 |
| 5(1)                                       | 1505.867  | 1467.880  | 0.999394 | 0.728489 | 0.461008 |
| 6(1)                                       | 1149.999  | 1089.178  | 1.001516 | 0.730909 | 0.459473 |
| 7(1)                                       | 1058.501  | 1029.814  | 0.981145 | 0.723010 | 0.457500 |
| 8(1)                                       | 1008.560  | 979.159   | 1.009077 | 0.737428 | 0.459162 |
| 9(1)                                       | 906.305   | 885.929   | 1.006706 | 0.733396 | 0.460744 |
| 10(1)                                      | 787.504   | 763.749   | 1.000696 | 0.727793 | 0.455994 |
| 11(1)                                      | 3093.135  | 2951.292  | 0.998610 | 0.729122 | 0.459947 |



|       |          |          |          |          |          |
|-------|----------|----------|----------|----------|----------|
| 12(1) | 1102.225 | 1082.504 | 1.011899 | 0.730099 | 0.464612 |
| 13(1) | 1006.674 | 977.718  | 0.994954 | 0.726327 | 0.454215 |
| 14(1) | 823.476  | 822.609  | 0.988133 | 0.722387 | 0.460424 |
| 15(1) | 582.765  | 587.349  | 0.994794 | 0.726184 | 0.461046 |

ZPEharm = 12119.86716 cm-1 = 34.652 Kcal/mol = 144.986 KJ/mol  
 ZPEfund = 11820.48728 cm-1 = 33.796 Kcal/mol = 141.404 KJ/mol  
 ZPEaver = 11970.17722 cm-1 = 34.224 Kcal/mol = 143.195 KJ/mol  
 -1/4sumXii = 50.14714 cm-1 = 0.143 Kcal/mol = 0.600 KJ/mol  
 x0 = -34.01606 cm-1 = -0.097 Kcal/mol = -0.407 KJ/mol  
 ZPEtot = 11986.30830 cm-1 = 34.271 Kcal/mol = 143.388 KJ/mol  
 ZPEtot/ZPEharm = 0.98898    ZPEfund/ZPEharm= 0.97530

=====  
 B7.    TS 1 (allyl -> allene + H) (Cs)  
 -----

Vibrational Energies and Rotational Constants (cm-1)

| Mode(Quanta)                               | E(harm)   | E(anharm) | Aa(z)    | Ba(x)    | Ca(y)    |
|--------------------------------------------|-----------|-----------|----------|----------|----------|
| Equilibrium Geometry                       |           |           |          |          |          |
| Ground State                               | 11834.048 | -nan      | 2.004501 | 0.296885 | 0.273154 |
| Fundamental Bands (DE w.r.t. Ground State) |           |           |          |          |          |
| 1(1)                                       | -679.831  | -nan      | 2.010999 | 0.296877 | 0.273381 |
| 2(1)                                       | 3200.791  | 3104.342  | 2.000648 | 0.296596 | 0.272879 |
| 3(1)                                       | 3114.199  | 3012.243  | 1.995933 | 0.296658 | 0.272921 |
| 4(1)                                       | 3109.649  | 2995.758  | 1.996362 | 0.296642 | 0.272929 |
| 5(1)                                       | 1946.859  | 1896.003  | 1.997816 | 0.294974 | 0.271404 |
| 6(1)                                       | 1448.003  | 1408.536  | 2.010707 | 0.296761 | 0.273113 |
| 7(1)                                       | 1400.111  | 1362.574  | 2.013959 | 0.297136 | 0.273327 |
| 8(1)                                       | 1076.769  | 1064.257  | 2.008613 | 0.296385 | 0.272749 |
| 9(1)                                       | 989.054   | 979.717   | 2.015820 | 0.297723 | 0.272942 |
| 10(1)                                      | 826.832   | 768.192   | 1.976556 | 0.297028 | 0.272825 |
| 11(1)                                      | 452.416   | 447.668   | 1.998114 | 0.298576 | 0.275162 |
| 12(1)                                      | 414.571   | 414.720   | 2.094316 | 0.298178 | 0.271247 |
| 13(1)                                      | 3189.693  | 3051.864  | 1.998036 | 0.296609 | 0.272915 |
| 14(1)                                      | 996.915   | 985.492   | 2.066927 | 0.296634 | 0.273746 |
| 15(1)                                      | 853.120   | 855.194   | 1.968004 | 0.296512 | 0.273363 |
| 16(1)                                      | 833.280   | 814.437   | 1.997123 | 0.296025 | 0.272668 |
| 17(1)                                      | 371.485   | 374.077   | 1.895586 | 0.297040 | 0.274003 |
| 18(1)                                      | 124.179   | 50.235    | 1.983713 | 0.296508 | 0.273342 |

ZPEharm = 11834.04758 cm-1 = 33.835 Kcal/mol = 141.567 KJ/mol  
 ZPEfund = 11460.02431 cm-1 = 32.766 Kcal/mol = 137.027 KJ/mol  
 ZPEaver = 11647.03321 cm-1 = 33.300 Kcal/mol = 139.262 KJ/mol  
 -1/4sumXii = 42.31236 cm-1 = 0.121 Kcal/mol = 0.506 KJ/mol  
 x0 = 2.88371 cm-1 = 0.008 Kcal/mol = 0.034 KJ/mol  
 ZPEtot = -nan cm-1 = -nan Kcal/mol = -nan KJ/mol  
 ZPEtot/ZPEharm = -nan    ZPEfund/ZPEharm= -nan

=====  
 B8.    TS 2 (allyl -> 2-propenyl) (C1)  
 -----

Vibrational Energies and Rotational Constants (cm-1)

| Mode(Quanta) | E(harm) | E(anharm) | Aa(z) | Ba(x) | Ca(y) |
|--------------|---------|-----------|-------|-------|-------|
|--------------|---------|-----------|-------|-------|-------|

|                                            |           |          |          |          |          |
|--------------------------------------------|-----------|----------|----------|----------|----------|
| Equilibrium Geometry                       |           |          | 2.581521 | 0.298301 | 0.279463 |
| Ground State                               | 12245.326 | -nan     | 2.586164 | 0.295564 | 0.277033 |
| Fundamental Bands (DE w.r.t. Ground State) |           |          |          |          |          |
| 1(1)                                       | -1820.338 | -inf     | 2.588041 | 0.295654 | 0.277112 |
| 2(1)                                       | 3173.245  | 3077.321 | 2.581183 | 0.295419 | 0.276873 |
| 3(1)                                       | 3169.231  | 3073.143 | 2.589662 | 0.294925 | 0.276558 |
| 4(1)                                       | 3064.521  | 2932.156 | 2.580794 | 0.295200 | 0.276673 |
| 5(1)                                       | 3042.438  | 2904.419 | 2.577120 | 0.295465 | 0.276869 |
| 6(1)                                       | 2176.245  | 2107.426 | 2.570836 | 0.295367 | 0.276536 |
| 7(1)                                       | 1646.036  | 1628.256 | 2.549497 | 0.295141 | 0.276307 |
| 8(1)                                       | 1431.991  | 1387.569 | 2.601581 | 0.295446 | 0.276792 |
| 9(1)                                       | 1405.848  | 1368.003 | 2.597614 | 0.295861 | 0.277000 |
| 10(1)                                      | 1121.014  | 1083.956 | 2.573582 | 0.295850 | 0.277228 |
| 11(1)                                      | 1078.671  | 1050.431 | 2.622732 | 0.294409 | 0.275861 |
| 12(1)                                      | 1004.288  | 983.661  | 2.601670 | 0.294909 | 0.276539 |
| 13(1)                                      | 961.817   | 942.625  | 2.625370 | 0.295619 | 0.276846 |
| 14(1)                                      | 821.610   | 804.846  | 2.570954 | 0.294567 | 0.276488 |
| 15(1)                                      | 809.277   | 800.704  | 2.542591 | 0.295456 | 0.277367 |
| 16(1)                                      | 689.544   | 655.163  | 2.574190 | 0.294727 | 0.276662 |
| 17(1)                                      | 411.509   | 389.453  | 2.691436 | 0.294974 | 0.276883 |
| 18(1)                                      | 303.705   | 299.130  | 2.521376 | 0.295681 | 0.277135 |

ZPEharm = 13368.46594 cm-1 = 38.222 Kcal/mol = 159.922 KJ/mol  
 ZPEfund = 11861.42435 cm-1 = 33.912 Kcal/mol = 141.821 KJ/mol  
 ZPEaver = 12244.88314 cm-1 = 35.010 Kcal/mol = 146.413 KJ/mol  
 -1/4sumXii = 73.11081 cm-1 = 0.209 Kcal/mol = 0.875 KJ/mol  
 x0 = -30.74314 cm-1 = -0.088 Kcal/mol = -0.368 KJ/mol  
 ZPEtot = -nan cm-1 = -nan Kcal/mol = -nan KJ/mol  
 ZPEtot/ZPEharm = -nan ZPEfund/ZPEharm = -nan

=====

B9. TS 3 (2-propenyl -> allene + H) (Cs)

-----

Vibrational Energies and Rotational Constants (cm-1)

| Mode(Quanta)                               | E(harm)   | E(anharm) | Aa(z)    | Ba(x)    | Ca(y)    |
|--------------------------------------------|-----------|-----------|----------|----------|----------|
| Equilibrium Geometry                       |           |           | 2.220816 | 0.273910 | 0.256679 |
| Ground State                               | 11892.852 | -nan      | 2.195778 | 0.275296 | 0.256644 |
| Fundamental Bands (DE w.r.t. Ground State) |           |           |          |          |          |
| 1(1)                                       | -440.625  | -nan      | 2.196031 | 0.275433 | 0.257128 |
| 2(1)                                       | 3176.364  | 3080.132  | 2.184475 | 0.275139 | 0.256392 |
| 3(1)                                       | 3115.691  | 3021.032  | 2.182836 | 0.275084 | 0.256484 |
| 4(1)                                       | 3100.940  | 2993.906  | 2.185841 | 0.275141 | 0.256388 |
| 5(1)                                       | 1980.607  | 1942.749  | 2.139006 | 0.274316 | 0.255031 |
| 6(1)                                       | 1446.812  | 1408.254  | 2.200391 | 0.275224 | 0.256537 |
| 7(1)                                       | 1395.959  | 1362.504  | 2.209416 | 0.275443 | 0.256805 |
| 8(1)                                       | 1082.064  | 1066.610  | 2.239586 | 0.275578 | 0.256221 |
| 9(1)                                       | 984.441   | 973.781   | 2.219322 | 0.275853 | 0.256459 |
| 10(1)                                      | 849.452   | 887.574   | 2.189232 | 0.275047 | 0.256411 |
| 11(1)                                      | 363.936   | 373.774   | 0.265592 | 0.231796 | 0.257103 |
| 12(1)                                      | 196.947   | 210.899   | 2.062240 | 0.277278 | 0.257192 |
| 13(1)                                      | 3191.432  | 3148.221  | 2.182755 | 0.275146 | 0.256430 |
| 14(1)                                      | 996.405   | 925.539   | 2.225493 | 0.275941 | 0.257440 |
| 15(1)                                      | 867.443   | 869.292   | 2.167070 | 0.274903 | 0.255984 |
| 16(1)                                      | 842.746   | 829.480   | 2.166810 | 0.274795 | 0.256856 |
| 17(1)                                      | 366.315   | 354.802   | 4.162293 | 0.319790 | 0.257517 |

18(1) 268.773 67.159 2.295534 0.276198 0.257138

ZPEharm = 11892.85156 cm-1 = 34.003 Kcal/mol = 142.270 KJ/mol  
ZPEfund = 11544.21345 cm-1 = 33.006 Kcal/mol = 138.031 KJ/mol  
ZPEaver = 11718.53214 cm-1 = 33.505 Kcal/mol = 142.204 KJ/mol  
-1/4sumXii = 13.45445 cm-1 = 0.038 Kcal/mol = 0.161 KJ/mol  
x0 = 17.23218 cm-1 = 0.049 Kcal/mol = 0.206 KJ/mol  
ZPEtot = -nan cm-1 = -nan Kcal/mol = -nan KJ/mol  
ZPEtot/ZPEharm = -nan ZPEfund/ZPEharm = -nan

=====  
B10. TS 4 (2-propenyl -> propine + H) (Cs)  
-----

Vibrational Energies and Rotational Constants (cm-1)

| Mode(Quanta)                               | E(harm)   | E(anharm) | Aa(z)     | Ba(x)    | Ca(y)    |
|--------------------------------------------|-----------|-----------|-----------|----------|----------|
| Equilibrium Geometry                       |           |           | 2.261777  | 0.266349 | 0.249634 |
| Ground State                               | 11858.908 | -nan      | 2.221079  | 0.266443 | 0.250033 |
| Fundamental Bands (DE w.r.t. Ground State) |           |           |           |          |          |
| 1(1)                                       | -472.363  | -nan      | 2.223167  | 0.266629 | 0.250371 |
| 2(1)                                       | 3433.554  | 3330.021  | 2.196727  | 0.266217 | 0.249536 |
| 3(1)                                       | 3077.010  | 3080.142  | 2.210326  | 0.266333 | 0.250039 |
| 4(1)                                       | 3007.154  | 2853.854  | 2.215263  | 0.266348 | 0.250004 |
| 5(1)                                       | 2140.631  | 2104.985  | 2.186369  | 0.265516 | 0.248757 |
| 6(1)                                       | 1450.373  | 1392.084  | -1.163702 | 0.224570 | 0.251298 |
| 7(1)                                       | 1378.261  | 1342.381  | 2.172071  | 0.265776 | 0.248752 |
| 8(1)                                       | 1018.843  | 988.004   | 2.054773  | 0.263907 | 0.249952 |
| 9(1)                                       | 935.758   | 925.990   | 2.230338  | 0.266367 | 0.248886 |
| 10(1)                                      | 671.178   | -1842.110 | 2.298143  | 0.269462 | 0.250603 |
| 11(1)                                      | 352.894   | 301.940   | 2.657039  | 0.271135 | 0.250328 |
| 12(1)                                      | 201.263   | -327.437  | 2.263038  | 0.268496 | 0.250562 |
| 13(1)                                      | 3081.077  | 2907.820  | 2.223880  | 0.266438 | 0.249989 |
| 14(1)                                      | 1450.698  | 1412.651  | 5.659415  | 0.308990 | 0.250194 |
| 15(1)                                      | 1028.712  | 995.078   | 2.385785  | 0.268948 | 0.249937 |
| 16(1)                                      | 601.393   | 620.694   | 2.141157  | 0.264534 | 0.250350 |
| 17(1)                                      | 334.146   | 334.805   | 1.845106  | 0.262319 | 0.250885 |
| 18(1)                                      | 27.233    | -381.093  | 2.099127  | 0.264181 | 0.250958 |

ZPEharm = 11858.90781 cm-1 = 33.906 Kcal/mol = 141.864 KJ/mol  
ZPEfund = 11454.60321 cm-1 = 32.750 Kcal/mol = 136.961 KJ/mol  
ZPEaver = 11656.75432 cm-1 = 33.328 Kcal/mol = 139.379 KJ/mol  
-1/4sumXii = 57.88401 cm-1 = 0.165 Kcal/mol = 0.692 KJ/mol  
x0 = -25.85630 cm-1 = -0.074 Kcal/mol = -0.309 KJ/mol  
ZPEtot = -nan cm-1 = -nan Kcal/mol = -nan KJ/mol  
ZPEtot/ZPEharm = -nan ZPEfund/ZPEharm = -nan

=====  
B11. TS 5 (allyl -> cyclopropyl) (C1)  
-----

Vibrational Energies and Rotational Constants (cm-1)

| Mode(Quanta)                               | E(harm)   | E(anharm) | Aa(z)    | Ba(x)    | Ca(y)    |
|--------------------------------------------|-----------|-----------|----------|----------|----------|
| Equilibrium Geometry                       |           |           | 1.044715 | 0.471748 | 0.368119 |
| Ground State                               | 13368.466 | -nan      | 1.033669 | 0.469202 | 0.365194 |
| Fundamental Bands (DE w.r.t. Ground State) |           |           |          |          |          |

|       |          |          |          |          |          |
|-------|----------|----------|----------|----------|----------|
| 1(1)  | -931.841 | -inf     | 1.032497 | 0.468845 | 0.365154 |
| 2(1)  | 3206.012 | 3109.931 | 1.031808 | 0.468884 | 0.365029 |
| 3(1)  | 3176.137 | 3080.124 | 1.031061 | 0.468329 | 0.364665 |
| 4(1)  | 3152.494 | 3016.335 | 1.031369 | 0.469398 | 0.365021 |
| 5(1)  | 3103.842 | 2971.177 | 1.031458 | 0.468769 | 0.365066 |
| 6(1)  | 3032.673 | 2927.554 | 1.032002 | 0.469163 | 0.365071 |
| 7(1)  | 1493.617 | 1442.489 | 1.033280 | 0.468878 | 0.364903 |
| 8(1)  | 1421.659 | 1396.332 | 1.033329 | 0.469020 | 0.365497 |
| 9(1)  | 1326.517 | 1297.841 | 1.032657 | 0.468721 | 0.365169 |
| 10(1) | 1256.300 | 1238.685 | 1.033398 | 0.469037 | 0.363883 |
| 11(1) | 1098.462 | 1071.023 | 1.031494 | 0.469758 | 0.364450 |
| 12(1) | 1030.880 | 994.359  | 1.031266 | 0.469490 | 0.365481 |
| 13(1) | 907.492  | 879.376  | 1.052704 | 0.469922 | 0.364766 |
| 14(1) | 895.944  | 875.216  | 1.012829 | 0.467449 | 0.365389 |
| 15(1) | 747.279  | 714.539  | 1.031497 | 0.468062 | 0.364536 |
| 16(1) | 638.368  | 597.294  | 1.036602 | 0.468766 | 0.364867 |
| 17(1) | 617.059  | 608.832  | 1.032775 | 0.469555 | 0.364382 |
| 18(1) | 564.040  | 550.822  | 1.031921 | 0.468508 | 0.364318 |

ZPEharm = 13368.46594 cm-1 = 38.222 Kcal/mol = 159.922 KJ/mol  
 ZPEfund = 12933.04112 cm-1 = 36.979 Kcal/mol = 154.645 KJ/mol  
 ZPEaver = 13150.75324 cm-1 = 37.401 Kcal/mol = 157.143 KJ/mol  
 -1/4sumXii = 68.28871 cm-1 = 0.195 Kcal/mol = 0.817 KJ/mol  
 x0 = -26.00637 cm-1 = -0.074 Kcal/mol = -0.311 KJ/mol  
 ZPEtot = -nan cm-1 = -nan Kcal/mol = -nan KJ/mol  
 ZPEtot/ZPEharm = -nan ZPEfund/ZPEharm = -nan

=====

B12. TS 6 (cyclopropyl -> cyclopropene + H) (C1)

-----

Vibrational Energies and Rotational Constants (cm-1)

| Mode(Quanta)                               | E(harm)   | E(anharm) | Aa(z)    | Ba(x)    | Ca(y)    |
|--------------------------------------------|-----------|-----------|----------|----------|----------|
| Equilibrium Geometry                       |           |           | 0.730036 | 0.616669 | 0.426086 |
| Ground State                               | 12024.449 | -nan      | 0.734175 | 0.605019 | 0.422382 |
| Fundamental Bands (DE w.r.t. Ground State) |           |           |          |          |          |
| 1(1)                                       | -533.586  | -inf      | 0.735992 | 0.606100 | 0.422863 |
| 2(1)                                       | 3267.520  | 3168.102  | 0.731852 | 0.604328 | 0.421544 |
| 3(1)                                       | 3224.990  | 3080.231  | 0.731984 | 0.604376 | 0.421631 |
| 4(1)                                       | 3095.379  | 2947.318  | 0.733966 | 0.604590 | 0.422335 |
| 5(1)                                       | 3025.749  | 2951.894  | 0.733591 | 0.604412 | 0.422302 |
| 6(1)                                       | 1664.142  | 1633.419  | 0.731819 | 0.605064 | 0.421422 |
| 7(1)                                       | 1499.940  | 1455.545  | 0.734974 | 0.604271 | 0.422999 |
| 8(1)                                       | 1148.860  | 1106.966  | 0.734362 | 0.606326 | 0.422113 |
| 9(1)                                       | 1094.938  | 1069.041  | 0.745630 | 0.606254 | 0.425586 |
| 10(1)                                      | 1057.871  | 1031.749  | 0.722210 | 0.600223 | 0.420481 |
| 11(1)                                      | 1012.078  | 979.814   | 0.735514 | 0.606013 | 0.420581 |
| 12(1)                                      | 1002.110  | 971.439   | 0.733952 | 0.604961 | 0.419730 |
| 13(1)                                      | 902.872   | 880.020   | 0.737626 | 0.607474 | 0.423308 |
| 14(1)                                      | 813.370   | 615.691   | 0.730833 | 0.602292 | 0.421904 |
| 15(1)                                      | 784.482   | 735.189   | 0.733709 | 0.602892 | 0.419436 |
| 16(1)                                      | 601.929   | 12.217    | 0.732583 | 0.602688 | 0.423430 |
| 17(1)                                      | 236.833   | 265.617   | 0.740901 | 0.603637 | 0.425767 |
| 18(1)                                      | 149.420   | 178.264   | 0.741929 | 0.591137 | 0.418043 |

ZPEharm = 12024.44878 cm-1 = 34.380 Kcal/mol = 143.844 KJ/mol

ZPEfund = 11305.15832 cm-1 = 32.324 Kcal/mol = 135.179 KJ/mol  
 ZPEaver = 11664.75223 cm-1 = 33.351 Kcal/mol = 139.475 KJ/mol  
 -1/4sumXii = 83.32950 cm-1 = 0.238 Kcal/mol = 0.997 KJ/mol  
 x0 = -38.76695 cm-1 = -0.111 Kcal/mol = -0.464 KJ/mol  
 ZPEtot = -nan cm-1 = -nan Kcal/mol = -nan KJ/mol  
 ZPEtot/ZPEharm = -nan ZPEfund/ZPEharm= -nan

C.) CASSCF(3,3)/6-311+G(3df,3pd) optimized geometries and MRCI/cc-pVXZ energies of selected points in the A 2B1 state

=====  
 C1. Allyl A-state equilibrium (C2)  
 -----

|   |           |           |           |
|---|-----------|-----------|-----------|
| 6 | 0.000000  | 0.000000  | 0.513175  |
| 6 | 0.000000  | 1.268989  | -0.201252 |
| 6 | 0.000000  | -1.268989 | -0.201252 |
| 1 | 0.000000  | 0.000000  | 1.587233  |
| 1 | 0.464516  | 1.329960  | -1.166598 |
| 1 | -0.727013 | 2.022556  | 0.040967  |
| 1 | -0.464516 | -1.329960 | -1.166598 |
| 1 | 0.727013  | -2.022556 | 0.040967  |

Rotational constants (cm-1): 1.802, 0.346, 0.290

Energies / Hartree

CASSCF/6-311+G(3df,3pd): -116.4125602

MRCI cc-pVDZ: -116.7455417  
 cc-pVTZ: -116.8469879  
 cc-pVQZ: -116.8752536  
 CBS(est.): -116.8861711

=====  
 C2. Allyl A/X conical intersection 1 (C2)  
 -----

|   |           |           |           |
|---|-----------|-----------|-----------|
| 6 | 0.000000  | 0.000000  | 0.622739  |
| 6 | 0.000000  | 1.181953  | -0.225158 |
| 6 | 0.000000  | -1.181953 | -0.225158 |
| 1 | 0.000000  | 0.000000  | 1.693407  |
| 1 | 0.783975  | 1.292737  | -0.951707 |
| 1 | -0.908202 | 1.729153  | -0.412263 |
| 1 | -0.783975 | -1.292737 | -0.951707 |
| 1 | 0.908202  | -1.729153 | -0.412263 |

Energies / Hartree

CASSCF/6-311+G(3df,3pd): -116.4108053

MRCI cc-pVDZ: -116.7475766  
 cc-pVTZ: -116.8488215  
 cc-pVQZ: -116.8770755  
 CBS(est.): -116.8880123

=====  
C3. Allyl A/X conical intersection 2 (Cs)  
-----

|   |           |           |           |
|---|-----------|-----------|-----------|
| 6 | -0.033814 | 0.696634  | 0.000000  |
| 6 | -0.033814 | -0.253291 | 1.089818  |
| 6 | -0.033814 | -0.253291 | -1.089818 |
| 1 | -0.864730 | -0.915249 | 1.229171  |
| 1 | 0.667470  | 1.508978  | 0.000000  |
| 1 | 0.835316  | -0.409396 | 1.700422  |
| 1 | -0.864730 | -0.915249 | -1.229171 |
| 1 | 0.835316  | -0.409396 | -1.700422 |

Energies / Hartree

CASSCF/6-311+G(3df,3pd): -116.4186762

MRCI           cc-pVDZ: -116.7543095  
                  cc-pVTZ: -116.8569792  
                  cc-pVQZ: -116.8857061  
                  CBS(est.): -116.8968665

=====  
C4. Allyl ground state equilibrium (C2v)  
-----

Energies / Hartree

CASSCF/cc-pVTZ: -116.52446947

MRCI   cc-pVDZ: -116.85995664  
          cc-pVTZ: -116.96074011  
          cc-pVQZ: -116.98946263  
          CBS(est.): -117.00091104
